# Supplementary material for: Not all cells are created equal – endosomal escape in fluorescent nanodiamonds in different cells
Source: Royal Society of Chemistry journal article supplement (doi:10.1039/d1nr02503a), 2021-01-01
Supplement: d1nr02503a1.pdf [file d1nr02503a1.pdf]

Supplementary Information

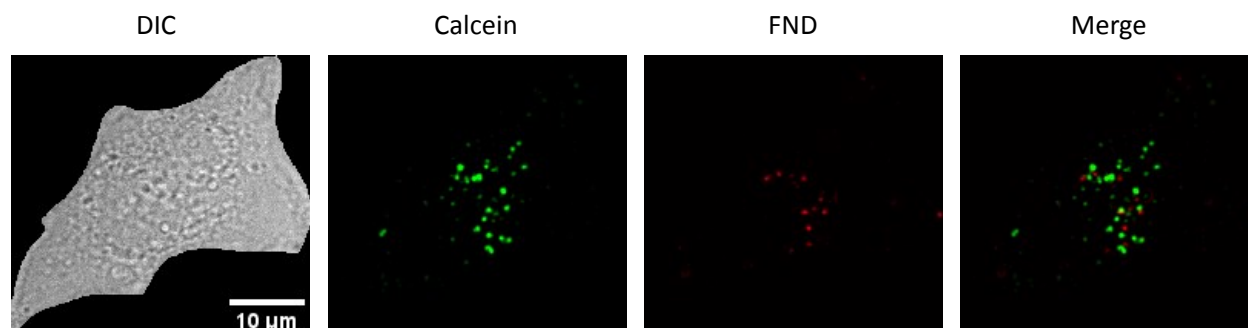

Figure S1. The representative image of a single cell.

Table S1. Number of cells that were counted at different incubation times.

| Number of cells | 1h | 2h | 4h | 8h | 10h |
|-----------------|----|----|----|----|-----|
| HeLa cells      | 51 | 47 | 54 | 66 | 66  |
| HUVECs          | 37 | 64 | 51 | 52 | 35  |

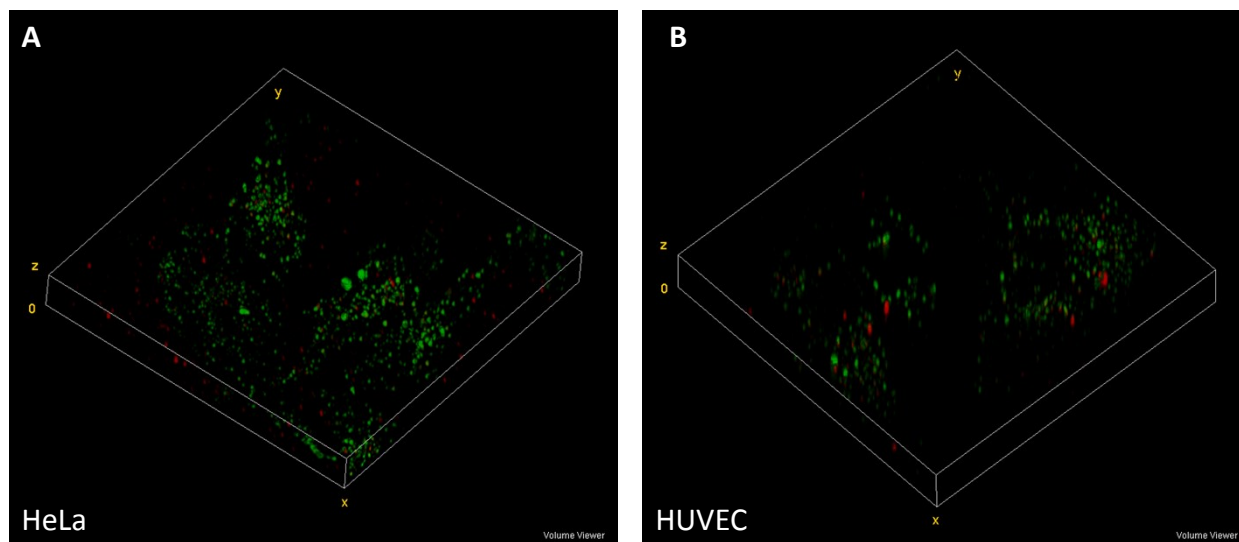

Figure S2. Representative 3D-reconstruction images of (A) HeLa cells and (B) HUVECs. Red is FND and green is calcein.

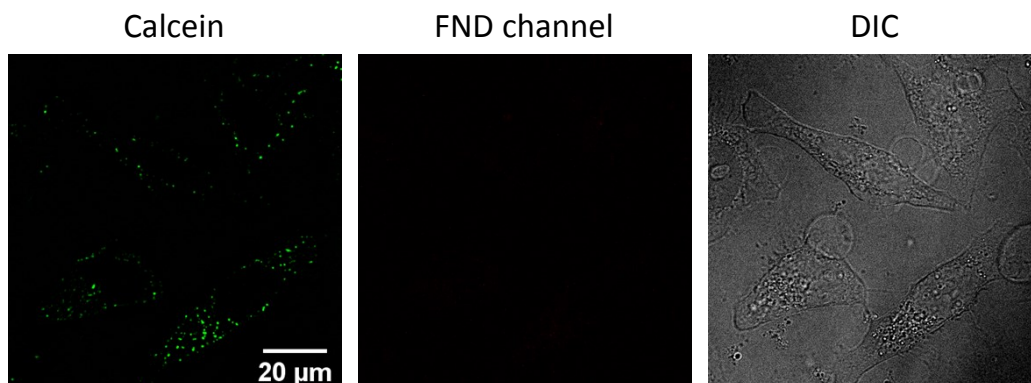

Figure S3. The representative image of a control group.

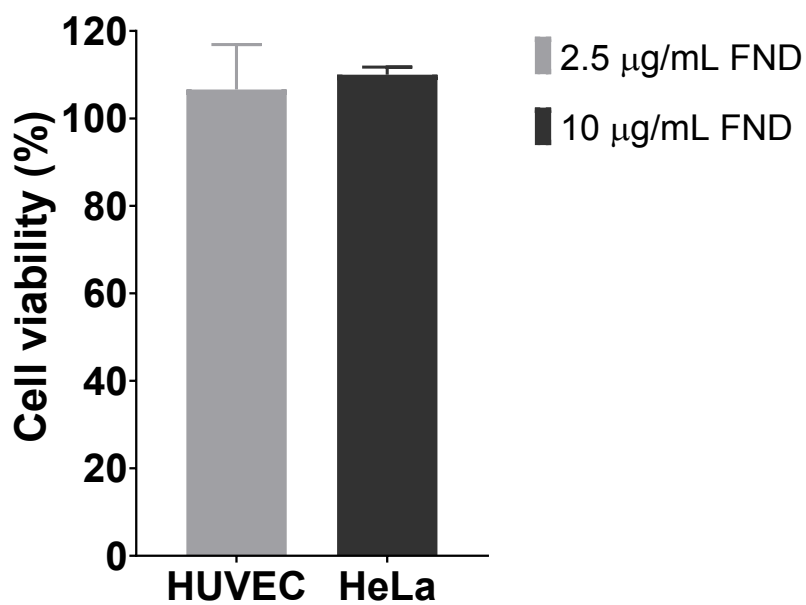

Figure S4. Cell viability measured by an MTT assay. 2.5 μg/mL FNDs were incubated with HUVECs for 24h and 10 μg/mL FNDs were incubated with HeLa cells for 24h. 100% represents the signal from cells without exposure to FNDs. The error bars represent the standard deviations of three experiments.
